# Supplementary material
Source: publisher figshare collection journal article supplement (https://acs.figshare.com/ndownloader/files/14653088)
Supplement: Supplementary file 1 [file 14653088]

**Figure S3**

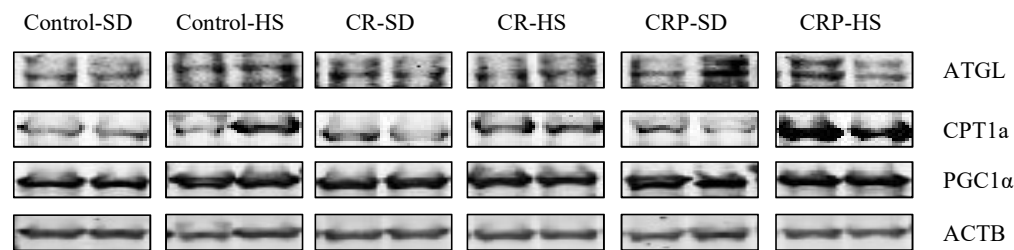

Representative bands of western blots performed to analyze ATGL, CPT1a and PGC1α levels in liver samples, related to Figure 3D. Two bands are shown for each experimental condition. SD: standard diet, HS: high sucrose diet, CR: offspring of calorie restricted dams, P (in CRP) indicates high-esterified pectin supplementation of the offspring. The corresponding bands of the reference protein (ACTB, β-Actin) are also shown.
